# Supplementary material for: Negative transcriptional control of ERBB2 gene by MBP-1 and HDAC1: diagnostic implications in breast cancer
Source: PubMed Central journal article supplement (PMC3599235; doi:10.1186/1471-2407-13-81), 2013-02-19
Supplement: 1471-2407-13-81-S1.pdf [file 1471-2407-13-81-S1.pdf]

**Table S1.** List of gene-specific oligonucleotides used in this study

| <b>(A) Oligonucleotides used for ERBB2 promoter luciferase reporter construct</b> |                                                                      |                    |
|-----------------------------------------------------------------------------------|----------------------------------------------------------------------|--------------------|
| Target sites*                                                                     | Sense (S) and Antisense (A) sequences (5' to 3') <sup>§</sup>        | Amplicon size (bp) |
| <i>HER-5</i>                                                                      | S: <u>GCTAGCGCTGGTCATGGTGGCACA</u>                                   | 787                |
| <i>HER-6</i>                                                                      | S: <u>GCTAGCACTTCAAAGATTCCAGAAGATATGC</u>                            | 558                |
| <i>HER-7</i>                                                                      | S: <u>GCTAGCCACCAGCCTCTGCATTTAGG</u>                                 | 306                |
| <i>HER-3</i>                                                                      | A: <u>GAAGATCTGGGCTCCCCTGGTTTCTC</u>                                 | -                  |
| <b>(B) Real time PCR oligonucleotides for ChIP assay</b>                          |                                                                      |                    |
| Target genes                                                                      | Forward (F) and reverse (R) sequences (5' to 3')                     | Amplicon size (bp) |
| <i>ERBB2</i>                                                                      | ERP1-F: ACTTCAAAGATTCCAGAAGATATGC<br>ERP2-R: GCTTGCATCCTACTCCATCC    | 162                |
| <i>ERBB2</i>                                                                      | ERP3-F: ACACATCCCCCTCCTTGACT<br>ERP4-R: CGGAGAATCCCTAAATGCAG         | 228                |
| <i>ERBB2</i>                                                                      | ERP5-F: CTCTGCATTTAGGATTCTCCG<br>ERP7-R: GGGCTCCCCTGGTTTCTC          | 294                |
| <i>MYC</i>                                                                        | MP3-F: AGGGCTTCTCAGAGGCTTG<br>MP4-R: TGCCTCTCGCTGGAATTACT            | 113                |
| <i>MYC</i>                                                                        | MD-F: ATT GTC CCC TCT CCT CCT GT<br>MD-R: CTT CGT CTC CCC TAC TGC TG | 166                |

Oligonucleotide positions in the ERBB2 promoter sequence are shown in supplementary Figure 1S. <sup>§</sup> The underlined sequence refers to the NheI or BglII restriction site added to each oligonucleotide to clone the amplified fragment in the pGL3 reporter plasmid.
