# Supplementary material for: Negative transcriptional control of ERBB2 gene by MBP-1 and HDAC1: diagnostic implications in breast cancer
Source: PubMed Central journal article supplement (PMC3599235; doi:10.1186/1471-2407-13-81), 2013-02-19
Supplement: 1471-2407-13-81-S3.pdf [file 1471-2407-13-81-S3.pdf]

Contino et al., supplementary figure S2

```

-780 GGAGAAACCCCGTCTTTACTAAAAATACAAAAAATTAGCTGGTCATGGTGGCACATGCCTGTA ATCCCCAGCTGCTCGGGAGGCT
                                     HER-5
GAGGCAGGAGAATCACTTGAACCAGGGAGGCAGAGGTTGTGGTGGCAGAGATCGCGCCATTGC TCTCCAGCCTGGGCAACAAGAGCAAAA
GTTCGTTTAAAAAAAAAAAAAAAAAGTCCTTTCGATGTGACTGTCTCTCCCAAAATTGTTAGACCCT CTTAAGATCATGCTTTTCAGATACTTC
                                     SmaI
AAAGATTCCAGAAGATATGCCCCGGGGGTCCTGGAAGMCACAAGGTAACACAACACATCCCCCTCCTTGACTATCAATTTTACTAGAGG A
HER-6/ERP1-F ERP3-F
TGTGGTGGGAAAACCATTATTTGATATTAAAACAAATAGGCTTGGGATGGAGTAGGATGCAAGC TCCCCAGGAAAGTTTAAGATAAAACCT
                                     ERP2-R ERP4 -R
GAGACTTAAAAGGGTGTTAAGAGTGGCAGCCTAGGGAATTTATCCCGGACTCCGGGGGAGGGGG CAGAGTCACCAGCCTCTGCATTTAGGG
HER-7
ERP5-F PstI
ATTCTCCGAGGAAAAGTGTGAGAACGG CTGCAGGCAACCCAGGCGTCCCGCGCTAGGAGGGACGCACCCAGGCCTGCGCGAAGAGAGGGA
GAAAGTGAAGCTGGGAGTTGCCACTCCAGACTTGTGGAATGCAGTTGGAGGGGGCGAGCTGG GAGCGCGCTTGCTCCCAATCACAGGAG
                                     +1
AAGGAGGAGGTGGAGGAGGAGGGCTGCTTGAGGAAG TATAAGAATGAAGTTGTGAAGCT GAGATTCCCCTCCATTGGGACCGGAGAAACCA
                                     SmaI
GGGGAGCCC CCCGGGCAGCCGCGCGCCCTTCCACGGGGCCCTTTACTGCGCGCGCGCCCGGCCCCACCCCTCGCA GC +113
HER-3

```

**Figure S2.** Nucleotide sequence of the human *ERBB2* promoter and upstream regions. The nucleotide sequence is numbered with the major transcription start site designated as + 1 (according to NCBI RefSeq: NG\_007503.1). Positions of relevant restriction sites are indicated and A/T-rich elements are boxed. Arrows indicate the position of oligonucleotides used for the construction of the *ERBB2*-luciferase reporter plasmids and for ChIP-qPCR assays (see additional\_file\_1).
